# Supplementary material
Source: PubMed Central journal article supplement (PMC2810461)
Supplement: NIHMS168077-supplement-Suppl_file.pdf [file NIHMS168077-supplement-Suppl_file.pdf]

**Supplemental Figure 1.** Region of Interest (ROI) definitions for regions used in correlation matrices. Each plane is 0.26mm in height.

**LVF & RVF**  
 Ventral Frontal Cortex  
 (5 planes)  
**Dorsal Limit:**  
 Middle of the genu of the corpus callosum  
**Medial-Posterior Limit:**  
 Anterior cingulate sulcus  
**Lateral-Posterior Limit:**  
 Circular Sulcus/Sylvian Fissure

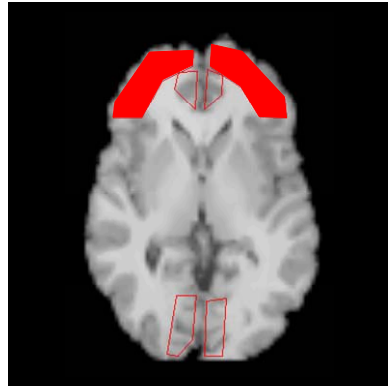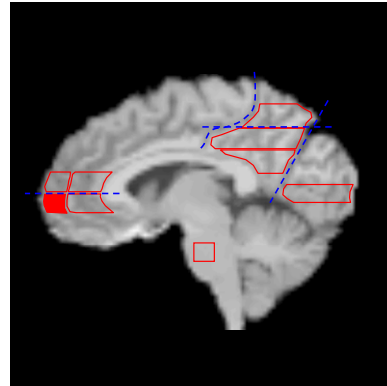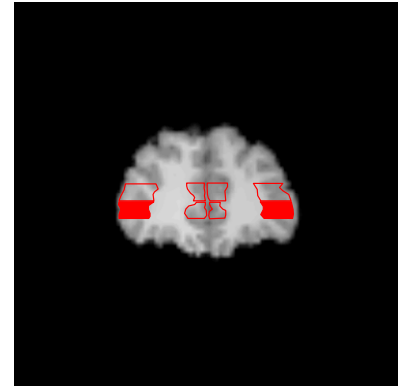

**LDF & RDF**  
 Dorsal Frontal Cortex  
 (5 planes)  
**Ventral Limit:**  
 Middle of the genu of the corpus callosum  
**Medial-Posterior Limit:**  
 Anterior cingulate sulcus  
**Lateral-Posterior Limit:**  
 Circular Sulcus & Pre-Central Sulcus (most superiorly)

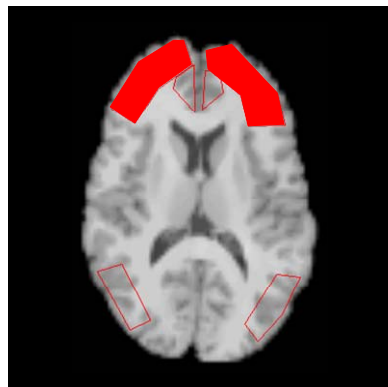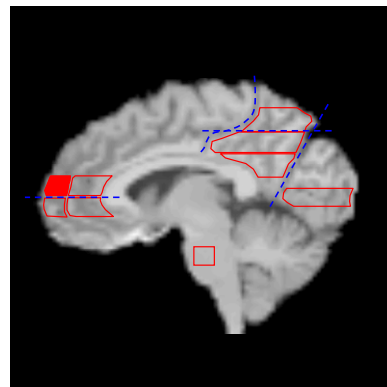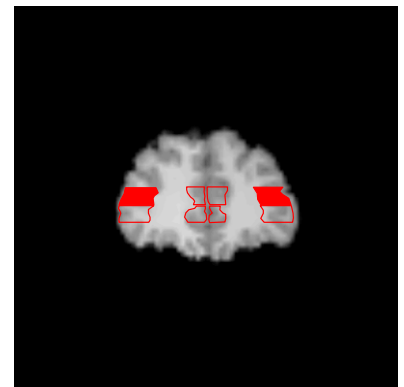

**LSA & RSA**  
 Subgenual Ant. Cingulate  
 (5 planes)  
**Dorsal Limit:**  
 Middle of the genu of the corpus callosum  
**Anterior Limit:**  
 Anterior cingulate sulcus  
**Posterior Limit:**  
 Corpus callosum

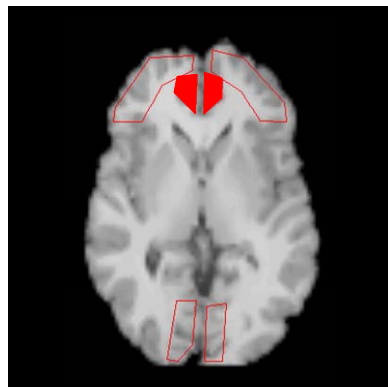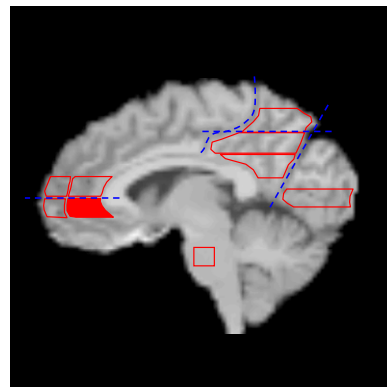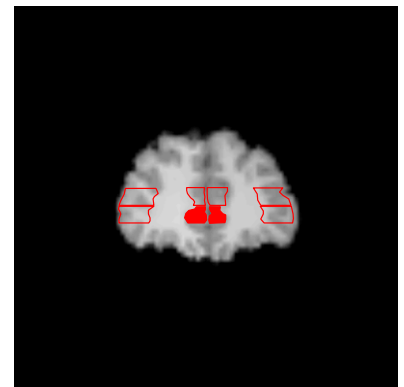

**LPA & RPA**

Pregenual Ant. Cingulate  
(5 planes)

**Ventral Limit:**

Middle of the genu of the  
corpus callosum

**Anterior Limit:**

Anterior cingulate sulcus

**Posterior Limit:**

Corpus collosum

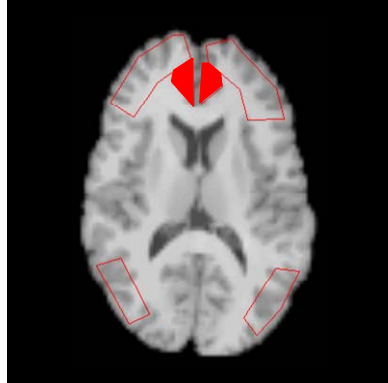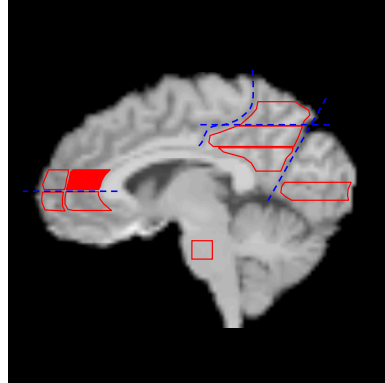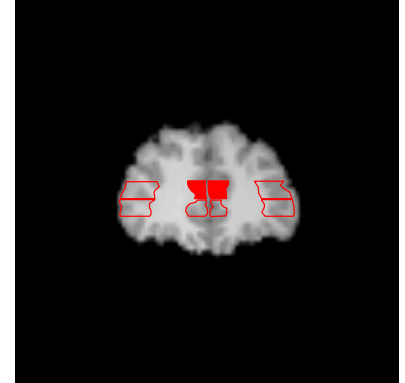

**LMT & RMT**

Mesial Temporal Cortex  
(2 planes)

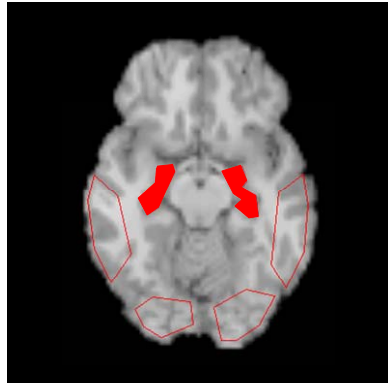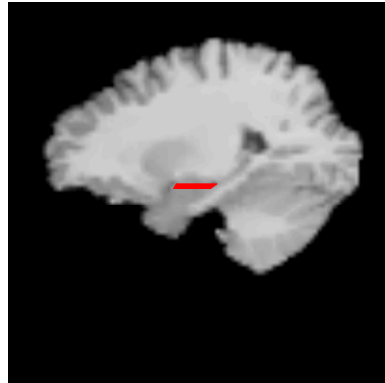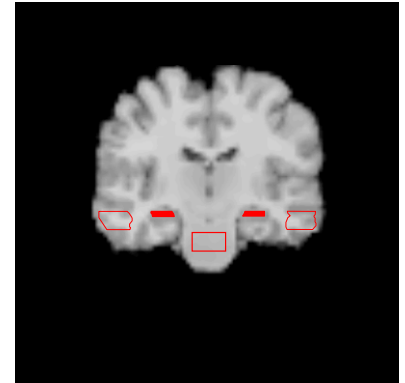

Best two contiguous  
planes containing  
amygdala & hippocampus

**LPL & RPL**

Lower Precuneus  
(3-5 planes)

**Dorsal Limit:**

Lower limit of LPM/RPM

**Anterior Limit:**

Splenium of corpus  
callosum

**Posterior Limit:**

Parieto-occipital sulcus

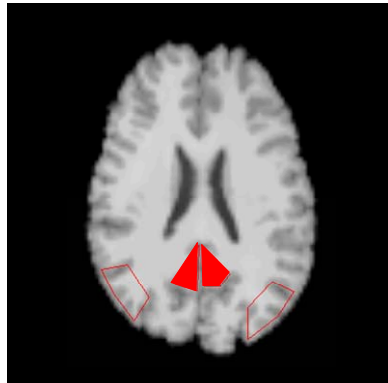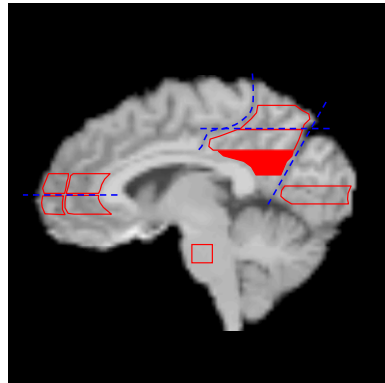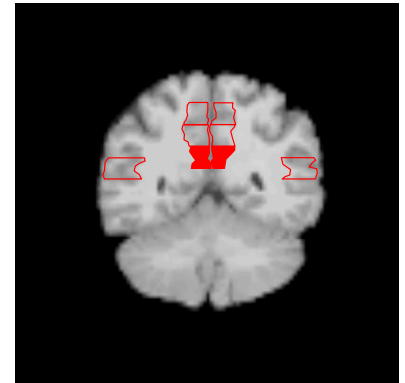

**LPM & RPM**

Middle Precuneus  
(5 planes)

**Dorsal Limit:**

Dorsal-most point of  
occipital lobe

**Anterior Limit:**

marginal/posterior branch  
of cingulate sulcus

**Posterior Limit:**

Parieto-occipital sulcus

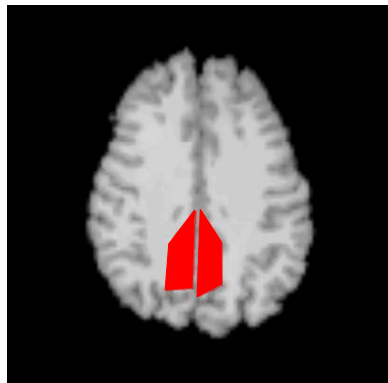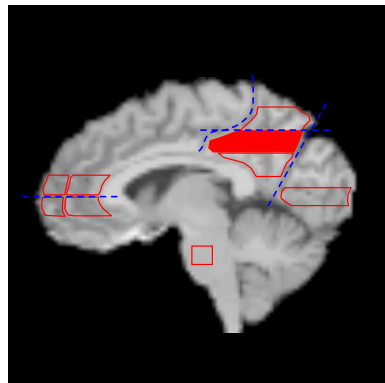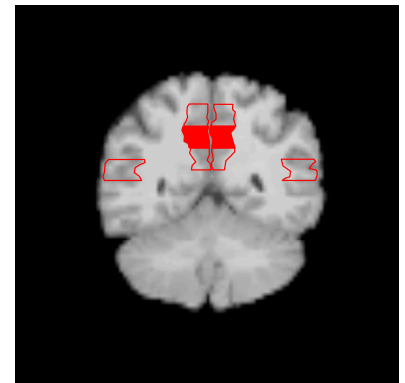

**LPU & RPU**

Upper Precuneus  
(5 planes)

**Ventral Limit:**

Dorsal-most point of  
occipital lobe

**Anterior Limit:**

marginal/posterior branch  
of cingulate sulcus

**Posterior Limit:**

Parieto-occipital sulcus or  
back of brain

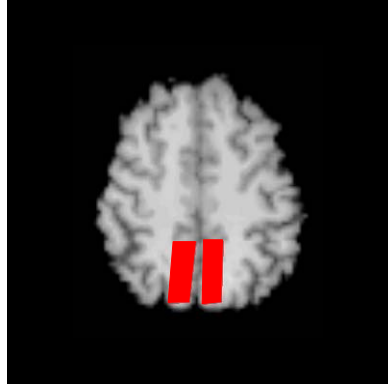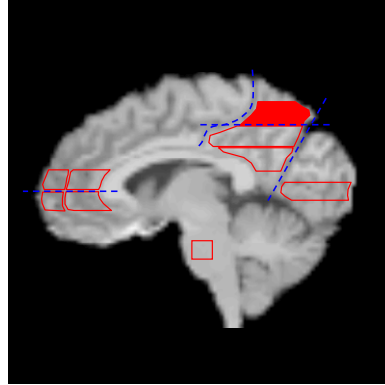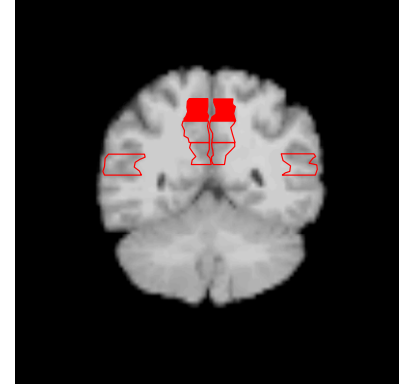

**LPR & RPR**

Parietal Cortex  
(5 planes)

**Ventral Limit:**

Calcarine Fissure

**Anterior Limit:**

Superior temporal sulcus,  
inferiorly; post. branches of  
post-central sulcus,  
superiorly

**Posterior Limit:**

Intraparietal Sulcus

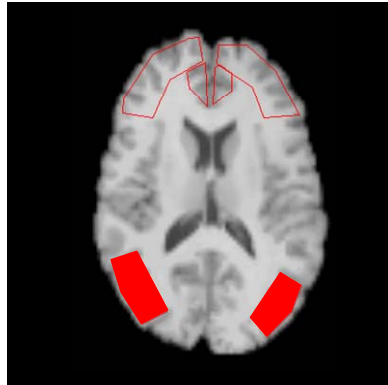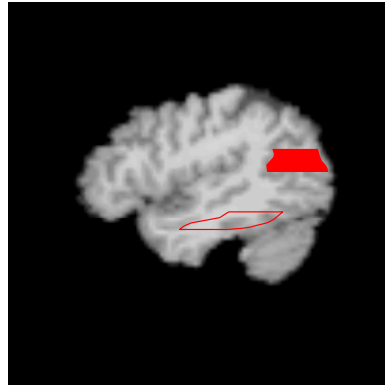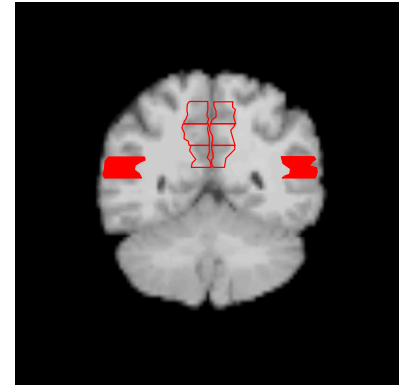

**LLT & RLT**

Lateral Temporal Cortex  
(5 planes)

**Dorsal Limit:**

Dorsal limit of LMT/ RMT

**Anterior Limit:**

Superior Temporal Sulcus

**Posterior Limit:**

Temporo-Occipital Sulcus

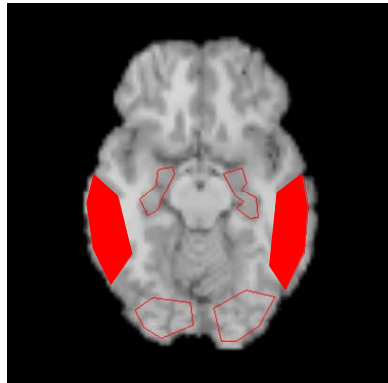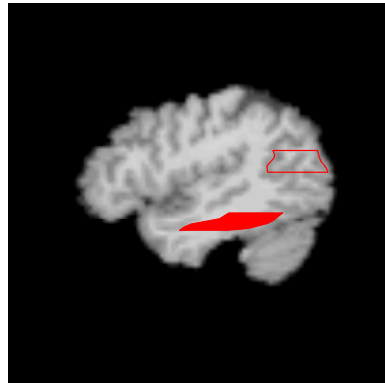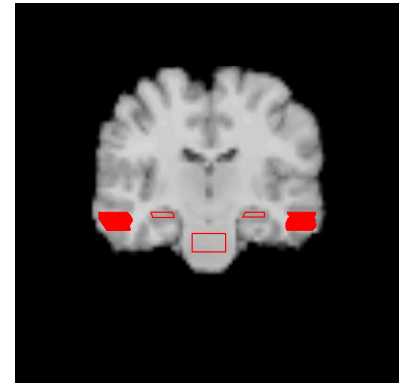

**LOC & ROC**

Occipital Cortex  
(5 planes)

**Dorsal Limit:**

Calcarine Fissure

**Anterior Limit:**

Parieto-Occipital Sulcus

**Posterior Limit:**

Back of brain

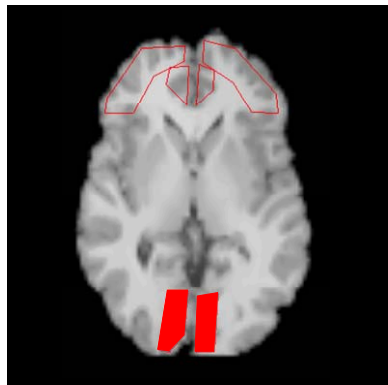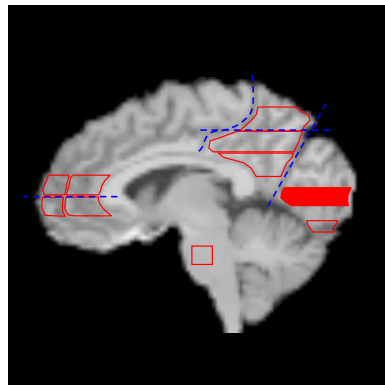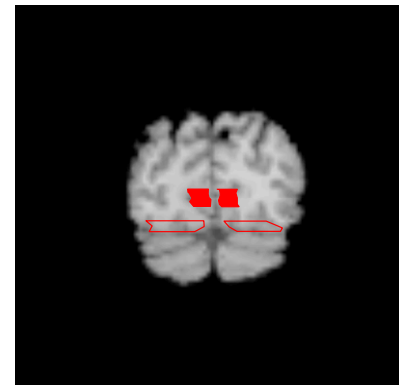

**LOP & ROP**

Occipital Pole  
(3-5 planes)

**Dorsal Limit:**

Dorsal limit of LMT/ RMT

**Anterior Limit:**

Cerebellum

**Lateral Limit:**

Lateral occipital sulcus

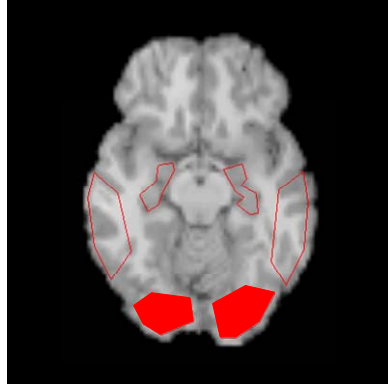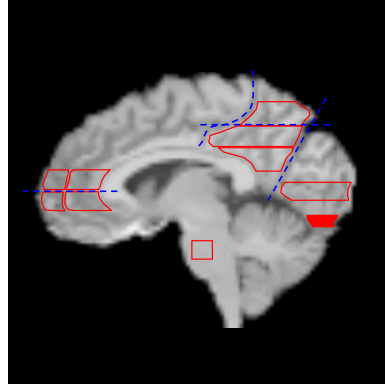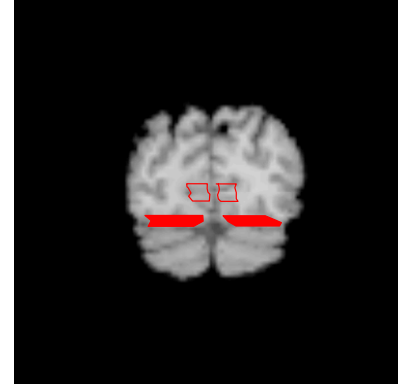

**Cerebellar Reference ROI**

(3 planes)

**Ventral Limit:**

2 planes above apex of  
fourth ventricle

**Size:**

Rectangle 1.25 x 2.5 cm  
angled parallel to folia

**Placement:**

Avoid white matter and  
cerebellar fissures

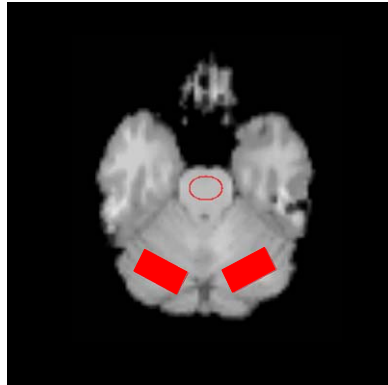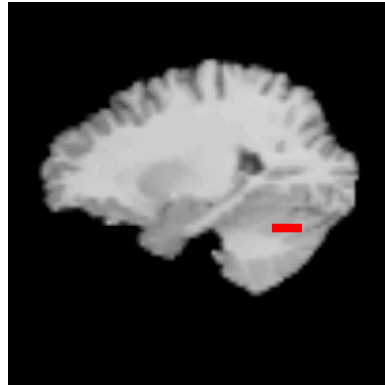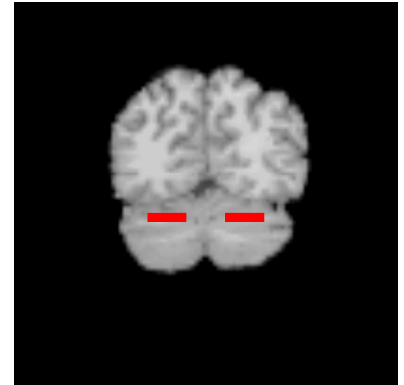

Supplemental Table 1: Correlation matrix for control subjects. Correlation coefficients with p-values significant after FDR control at  $q=0.05$  or  $q=0.1$  color coded using cool colors for negative correlations (blue:  $FDR < 0.05$ ; cyan:  $FDR < 0.1$ ) and warm colors for positive correlations (red:  $FDR < 0.05$ ; orange:  $FDR < 0.1$ ) Correlations with uncorrected  $p < 0.05$  that did not survive FDR control, were indicated in white (negative correlations) or yellow (positive correlations).

|     |    | LVF   | RVF   | LDF   | RDF   | LSA   | RSA   | LPC   | RPC   | LMT   | RMT   | LPL   | RPL   | LPM   | RPM   | LPU   | RPU   | LPR   | RPR   | LLT   | RLT   | LOC   | ROC   | LOP   | ROP   |     |  |
|-----|----|-------|-------|-------|-------|-------|-------|-------|-------|-------|-------|-------|-------|-------|-------|-------|-------|-------|-------|-------|-------|-------|-------|-------|-------|-----|--|
|     |    | PiB   | PiB |  |
|     | C  | 1     | 2     | 3     | 4     | 5     | 6     | 7     | 8     | 9     | 10    | 11    | 12    | 13    | 14    | 15    | 16    | 17    | 18    | 19    | 20    | 21    | 22    | 23    | 24    |     |  |
| fdg | 1  | -0.16 | 0.13  | -0.15 | 0.19  | -0.02 | 0.22  | 0.00  | 0.16  | 0.19  | 0.55  | -0.26 | -0.04 | -0.31 | -0.09 | -0.26 | 0.01  | -0.29 | 0.39  | -0.37 | 0.21  | -0.04 | 0.26  | -0.20 | 0.06  | LVF |  |
| fdg | 2  | 0.00  | -0.03 | -0.01 | -0.04 | -0.05 | 0.13  | -0.05 | 0.10  | 0.18  | 0.12  | -0.21 | -0.23 | -0.29 | -0.32 | -0.32 | -0.27 | -0.41 | -0.12 | -0.23 | -0.12 | 0.12  | 0.20  | 0.06  | -0.15 | RVF |  |
| fdg | 3  | -0.27 | 0.00  | -0.21 | 0.06  | -0.06 | 0.15  | -0.02 | 0.05  | 0.10  | 0.43  | -0.46 | -0.27 | -0.53 | -0.28 | -0.49 | -0.20 | -0.51 | 0.20  | -0.51 | 0.03  | -0.06 | 0.31  | -0.19 | 0.13  | LDF |  |
| fdg | 4  | -0.16 | -0.33 | -0.18 | -0.37 | -0.30 | -0.16 | -0.31 | -0.14 | 0.02  | -0.16 | -0.49 | -0.62 | -0.58 | -0.65 | -0.63 | -0.62 | -0.64 | -0.50 | -0.26 | -0.45 | 0.00  | 0.03  | -0.02 | -0.22 | RDF |  |
| fdg | 5  | 0.01  | 0.29  | -0.02 | 0.29  | 0.26  | 0.47  | 0.25  | 0.33  | 0.10  | 0.62  | -0.20 | 0.02  | -0.10 | 0.07  | -0.19 | 0.11  | -0.13 | 0.42  | 0.02  | 0.37  | -0.18 | 0.15  | -0.07 | 0.09  | LSA |  |
| fdg | 6  | 0.20  | 0.17  | 0.12  | 0.05  | 0.10  | 0.25  | 0.06  | 0.29  | -0.08 | 0.41  | -0.25 | -0.16 | -0.32 | -0.17 | -0.34 | -0.19 | -0.31 | -0.09 | -0.10 | -0.07 | -0.09 | 0.26  | -0.02 | 0.10  | RSA |  |
| fdg | 7  | -0.07 | 0.09  | -0.08 | 0.00  | 0.13  | 0.08  | 0.25  | 0.02  | -0.08 | 0.20  | -0.03 | -0.05 | -0.05 | 0.09  | -0.20 | -0.08 | -0.06 | 0.16  | 0.27  | 0.31  | 0.08  | 0.40  | 0.25  | 0.18  | LPC |  |
| fdg | 8  | 0.48  | 0.38  | 0.45  | 0.27  | 0.41  | 0.52  | 0.38  | 0.55  | 0.01  | 0.24  | -0.10 | -0.05 | -0.09 | -0.05 | -0.21 | -0.12 | -0.20 | -0.23 | 0.06  | -0.02 | 0.10  | 0.37  | 0.22  | 0.08  | RPC |  |
| fdg | 9  | 0.23  | 0.49  | 0.28  | 0.49  | 0.27  | 0.42  | 0.35  | 0.30  | 0.19  | 0.39  | 0.19  | 0.40  | 0.21  | 0.38  | 0.27  | 0.43  | 0.05  | 0.48  | -0.17 | 0.43  | -0.17 | 0.33  | -0.08 | 0.16  | LMT |  |
| fdg | 10 | -0.07 | -0.01 | -0.14 | -0.08 | -0.07 | 0.06  | 0.01  | -0.01 | -0.50 | 0.32  | -0.32 | -0.36 | -0.25 | -0.23 | -0.33 | -0.07 | -0.19 | -0.03 | -0.16 | -0.06 | -0.33 | -0.22 | -0.26 | -0.43 | RMT |  |
| fdg | 11 | 0.35  | 0.45  | 0.37  | 0.46  | 0.26  | 0.39  | 0.32  | 0.45  | -0.10 | 0.35  | -0.13 | 0.06  | -0.12 | 0.03  | -0.08 | 0.09  | -0.07 | 0.16  | -0.46 | 0.15  | -0.12 | 0.12  | -0.38 | -0.21 | LPL |  |
| fdg | 12 | 0.28  | 0.35  | 0.30  | 0.35  | 0.18  | 0.30  | 0.17  | 0.33  | 0.02  | 0.28  | -0.07 | 0.13  | -0.19 | -0.01 | -0.05 | 0.03  | -0.21 | 0.10  | -0.58 | -0.02 | -0.02 | 0.24  | -0.26 | 0.00  | RPL |  |
| fdg | 13 | 0.11  | 0.24  | 0.17  | 0.26  | 0.14  | 0.37  | 0.14  | 0.34  | 0.21  | 0.31  | -0.36 | -0.17 | -0.42 | -0.24 | -0.40 | -0.21 | -0.50 | 0.01  | -0.50 | -0.02 | 0.00  | 0.37  | -0.14 | 0.08  | LPM |  |
| fdg | 14 | 0.29  | 0.08  | 0.29  | 0.03  | -0.05 | 0.14  | -0.08 | 0.24  | -0.10 | 0.07  | -0.31 | -0.25 | -0.41 | -0.32 | -0.30 | -0.19 | -0.43 | -0.41 | -0.46 | -0.41 | -0.10 | 0.26  | -0.14 | 0.06  | RPM |  |
| fdg | 15 | -0.06 | 0.20  | -0.01 | 0.19  | 0.17  | 0.13  | 0.25  | 0.04  | 0.09  | -0.01 | 0.26  | 0.30  | 0.11  | 0.24  | 0.12  | 0.14  | -0.08 | 0.33  | -0.13 | 0.31  | 0.46  | 0.62  | 0.35  | 0.09  | LPU |  |
| fdg | 16 | 0.29  | 0.44  | 0.24  | 0.43  | 0.22  | 0.29  | 0.30  | 0.31  | -0.20 | 0.07  | 0.43  | 0.58  | 0.43  | 0.59  | 0.47  | 0.64  | 0.33  | 0.50  | 0.13  | 0.57  | 0.22  | 0.57  | 0.20  | 0.06  | RPU |  |
| fdg | 17 | -0.40 | -0.01 | -0.37 | 0.08  | -0.20 | -0.01 | -0.11 | -0.09 | -0.16 | 0.35  | -0.39 | -0.20 | -0.39 | -0.15 | -0.34 | -0.01 | -0.29 | 0.36  | -0.54 | 0.15  | -0.16 | 0.01  | -0.42 | -0.23 | LPR |  |
| fdg | 18 | -0.39 | -0.33 | -0.43 | -0.35 | -0.42 | -0.18 | -0.40 | -0.24 | -0.25 | -0.05 | -0.56 | -0.61 | -0.60 | -0.58 | -0.63 | -0.44 | -0.63 | -0.26 | -0.40 | -0.34 | -0.13 | -0.12 | -0.19 | -0.45 | RPR |  |
| fdg | 19 | -0.28 | 0.05  | -0.32 | 0.00  | -0.19 | 0.03  | -0.11 | -0.08 | -0.32 | 0.23  | -0.27 | -0.15 | -0.34 | -0.10 | -0.32 | -0.03 | -0.40 | 0.19  | -0.42 | 0.06  | -0.08 | 0.19  | -0.15 | -0.29 | LLT |  |
| fdg | 20 | 0.04  | 0.00  | 0.02  | -0.08 | -0.07 | 0.03  | -0.02 | -0.02 | -0.07 | -0.21 | 0.00  | -0.14 | -0.08 | -0.18 | -0.14 | -0.19 | -0.31 | -0.26 | -0.15 | -0.18 | 0.18  | 0.15  | 0.19  | -0.36 | RLT |  |
| fdg | 21 | -0.42 | -0.30 | -0.39 | -0.35 | -0.40 | -0.35 | -0.28 | -0.33 | -0.04 | 0.21  | -0.41 | -0.48 | -0.54 | -0.41 | -0.53 | -0.44 | -0.42 | -0.21 | -0.32 | -0.29 | -0.03 | 0.08  | -0.13 | -0.03 | LOC |  |
| fdg | 22 | -0.10 | 0.07  | -0.06 | 0.02  | -0.17 | -0.04 | -0.06 | 0.04  | -0.01 | 0.24  | -0.33 | -0.25 | -0.39 | -0.14 | -0.39 | -0.20 | -0.34 | -0.17 | -0.30 | -0.14 | -0.02 | 0.33  | -0.08 | 0.14  | ROC |  |
| fdg | 23 | -0.22 | -0.05 | -0.27 | -0.08 | -0.36 | -0.24 | -0.25 | -0.16 | -0.13 | 0.26  | -0.09 | -0.03 | -0.20 | 0.03  | -0.12 | 0.04  | -0.09 | 0.18  | -0.16 | 0.09  | -0.04 | 0.22  | -0.17 | -0.01 | LOP |  |
| fdg | 24 | -0.30 | -0.06 | -0.31 | -0.07 | -0.37 | -0.26 | -0.20 | -0.18 | -0.10 | 0.33  | -0.04 | 0.02  | -0.09 | 0.17  | -0.04 | 0.21  | 0.04  | 0.24  | -0.01 | 0.18  | 0.01  | 0.36  | -0.02 | 0.19  | ROP |  |

Supplemental Table 2: Correlation matrix for MCI subjects. Correlation coefficients with p-values significant after FDR control at  $q=0.05$  or  $q=0.1$  color coded using cool colors for negative correlations (blue:  $FDR < 0.05$ ; cyan:  $FDR < 0.1$ ) and warm colors for positive correlations (red:  $FDR < 0.05$ ; orange:  $FDR < 0.1$ ) Correlations with uncorrected  $p < 0.05$  that did not survive FDR control, were indicated in white (negative correlations) or yellow (positive correlations).

|     |    | LVF   | RVF   | LDF   | RDF   | LSA   | RSA   | LPC   | RPC   | LMT  | RMT   | LPL  | RPL  | LPM  | RPM  | LPU  | RPU   | LPR  | RPR  | LLT  | RLT  | LOC  | ROC  | LOP  | ROP  |     |
|-----|----|-------|-------|-------|-------|-------|-------|-------|-------|------|-------|------|------|------|------|------|-------|------|------|------|------|------|------|------|------|-----|
|     |    | PiB   | PiB  | PiB   | PiB  | PiB  | PiB  | PiB  | PiB  | PiB   | PiB  | PiB  | PiB  | PiB  | PiB  | PiB  | PiB  | PiB  |     |
|     | M  | 1     | 2     | 3     | 4     | 5     | 6     | 7     | 8     | 9    | 10    | 11   | 12   | 13   | 14   | 15   | 16    | 17   | 18   | 19   | 20   | 21   | 22   | 23   | 24   |     |
| fdg | 1  | 0.52  | 0.20  | 0.53  | 0.31  | 0.47  | 0.38  | 0.54  | 0.44  | 0.57 | 0.17  | 0.51 | 0.37 | 0.62 | 0.54 | 0.56 | 0.45  | 0.60 | 0.49 | 0.52 | 0.37 | 0.48 | 0.31 | 0.53 | 0.24 | LVF |
| fdg | 2  | 0.24  | 0.24  | 0.16  | 0.29  | 0.22  | 0.09  | 0.16  | 0.10  | 0.38 | 0.05  | 0.62 | 0.48 | 0.61 | 0.47 | 0.44 | 0.32  | 0.39 | 0.47 | 0.43 | 0.36 | 0.58 | 0.39 | 0.50 | 0.34 | RVF |
| fdg | 3  | 0.58  | 0.27  | 0.62  | 0.39  | 0.52  | 0.43  | 0.59  | 0.48  | 0.59 | 0.28  | 0.55 | 0.44 | 0.64 | 0.60 | 0.64 | 0.51  | 0.68 | 0.53 | 0.56 | 0.44 | 0.49 | 0.33 | 0.54 | 0.27 | LDF |
| fdg | 4  | 0.36  | 0.27  | 0.31  | 0.37  | 0.32  | 0.21  | 0.33  | 0.25  | 0.42 | 0.06  | 0.65 | 0.52 | 0.69 | 0.56 | 0.54 | 0.41  | 0.43 | 0.52 | 0.46 | 0.36 | 0.54 | 0.40 | 0.47 | 0.32 | RDF |
| fdg | 5  | 0.72  | 0.51  | 0.72  | 0.60  | 0.72  | 0.58  | 0.67  | 0.63  | 0.54 | 0.36  | 0.65 | 0.56 | 0.77 | 0.70 | 0.76 | 0.62  | 0.79 | 0.65 | 0.59 | 0.51 | 0.65 | 0.52 | 0.66 | 0.44 | LSA |
| fdg | 6  | 0.79  | 0.60  | 0.80  | 0.65  | 0.82  | 0.79  | 0.78  | 0.79  | 0.50 | 0.47  | 0.67 | 0.62 | 0.79 | 0.80 | 0.77 | 0.77  | 0.86 | 0.79 | 0.71 | 0.68 | 0.65 | 0.65 | 0.72 | 0.61 | RSA |
| fdg | 7  | 0.74  | 0.49  | 0.80  | 0.61  | 0.71  | 0.64  | 0.80  | 0.73  | 0.64 | 0.49  | 0.56 | 0.51 | 0.70 | 0.67 | 0.71 | 0.62  | 0.67 | 0.56 | 0.60 | 0.49 | 0.28 | 0.28 | 0.37 | 0.21 | LPC |
| fdg | 8  | 0.75  | 0.43  | 0.80  | 0.52  | 0.70  | 0.62  | 0.77  | 0.73  | 0.72 | 0.48  | 0.54 | 0.43 | 0.69 | 0.64 | 0.71 | 0.61  | 0.75 | 0.51 | 0.64 | 0.49 | 0.34 | 0.26 | 0.42 | 0.17 | RPC |
| fdg | 9  | 0.11  | 0.07  | 0.18  | 0.09  | 0.24  | 0.17  | 0.14  | 0.19  | 0.37 | 0.24  | 0.15 | 0.08 | 0.21 | 0.22 | 0.16 | 0.11  | 0.42 | 0.14 | 0.19 | 0.22 | 0.39 | 0.12 | 0.51 | 0.40 | LMT |
| fdg | 10 | 0.31  | 0.38  | 0.30  | 0.35  | 0.47  | 0.27  | 0.27  | 0.24  | 0.27 | 0.36  | 0.40 | 0.35 | 0.34 | 0.28 | 0.28 | 0.18  | 0.59 | 0.34 | 0.36 | 0.41 | 0.62 | 0.38 | 0.63 | 0.51 | RMT |
| fdg | 11 | 0.17  | 0.12  | 0.14  | 0.15  | 0.12  | 0.02  | 0.13  | 0.06  | 0.47 | 0.07  | 0.63 | 0.41 | 0.58 | 0.46 | 0.41 | 0.28  | 0.44 | 0.36 | 0.55 | 0.40 | 0.43 | 0.25 | 0.39 | 0.23 | LPL |
| fdg | 12 | 0.21  | 0.11  | 0.18  | 0.16  | 0.23  | 0.12  | 0.28  | 0.10  | 0.24 | -0.06 | 0.61 | 0.42 | 0.53 | 0.41 | 0.33 | 0.25  | 0.43 | 0.47 | 0.58 | 0.41 | 0.44 | 0.41 | 0.46 | 0.32 | RPL |
| fdg | 13 | 0.18  | 0.03  | 0.12  | 0.09  | 0.07  | 0.06  | 0.14  | 0.05  | 0.31 | -0.13 | 0.50 | 0.36 | 0.55 | 0.48 | 0.39 | 0.32  | 0.41 | 0.45 | 0.43 | 0.34 | 0.57 | 0.44 | 0.57 | 0.38 | LPM |
| fdg | 14 | 0.27  | 0.02  | 0.26  | 0.08  | 0.19  | 0.26  | 0.28  | 0.25  | 0.21 | -0.10 | 0.43 | 0.28 | 0.55 | 0.58 | 0.45 | 0.47  | 0.53 | 0.55 | 0.54 | 0.39 | 0.62 | 0.62 | 0.73 | 0.55 | RPM |
| fdg | 15 | 0.38  | 0.22  | 0.34  | 0.29  | 0.26  | 0.26  | 0.32  | 0.22  | 0.35 | 0.04  | 0.69 | 0.52 | 0.67 | 0.66 | 0.59 | 0.55  | 0.57 | 0.66 | 0.69 | 0.57 | 0.51 | 0.50 | 0.54 | 0.36 | LPU |
| fdg | 16 | 0.31  | 0.13  | 0.34  | 0.17  | 0.34  | 0.35  | 0.38  | 0.29  | 0.25 | 0.12  | 0.57 | 0.47 | 0.56 | 0.57 | 0.45 | 0.49  | 0.58 | 0.63 | 0.68 | 0.55 | 0.60 | 0.60 | 0.66 | 0.59 | RPU |
| fdg | 17 | 0.39  | 0.26  | 0.41  | 0.28  | 0.44  | 0.41  | 0.49  | 0.36  | 0.45 | 0.33  | 0.55 | 0.50 | 0.51 | 0.49 | 0.37 | 0.41  | 0.58 | 0.54 | 0.67 | 0.61 | 0.40 | 0.37 | 0.46 | 0.39 | LPR |
| fdg | 18 | -0.09 | -0.14 | -0.11 | -0.12 | -0.11 | -0.05 | 0.01  | -0.14 | 0.00 | -0.20 | 0.31 | 0.25 | 0.26 | 0.25 | 0.05 | 0.10  | 0.19 | 0.31 | 0.37 | 0.30 | 0.33 | 0.38 | 0.38 | 0.39 | RPR |
| fdg | 19 | 0.31  | 0.09  | 0.37  | 0.13  | 0.32  | 0.36  | 0.43  | 0.36  | 0.53 | 0.36  | 0.28 | 0.29 | 0.35 | 0.35 | 0.27 | 0.33  | 0.40 | 0.32 | 0.43 | 0.39 | 0.23 | 0.14 | 0.30 | 0.22 | LLT |
| fdg | 20 | -0.16 | -0.13 | -0.19 | -0.13 | -0.17 | -0.20 | -0.17 | -0.21 | 0.20 | -0.09 | 0.37 | 0.20 | 0.30 | 0.23 | 0.11 | 0.09  | 0.17 | 0.20 | 0.35 | 0.23 | 0.38 | 0.24 | 0.36 | 0.27 | RLT |
| fdg | 21 | 0.44  | 0.35  | 0.43  | 0.37  | 0.38  | 0.47  | 0.47  | 0.37  | 0.50 | 0.37  | 0.64 | 0.67 | 0.60 | 0.61 | 0.50 | 0.58  | 0.49 | 0.64 | 0.67 | 0.68 | 0.31 | 0.35 | 0.27 | 0.31 | LOC |
| fdg | 22 | 0.37  | 0.32  | 0.42  | 0.34  | 0.37  | 0.44  | 0.42  | 0.40  | 0.56 | 0.39  | 0.61 | 0.57 | 0.62 | 0.63 | 0.49 | 0.54  | 0.54 | 0.54 | 0.66 | 0.64 | 0.26 | 0.26 | 0.29 | 0.35 | ROC |
| fdg | 23 | 0.12  | 0.11  | 0.07  | 0.13  | 0.03  | 0.16  | 0.16  | 0.01  | 0.15 | -0.02 | 0.34 | 0.38 | 0.27 | 0.33 | 0.15 | 0.24  | 0.20 | 0.40 | 0.36 | 0.44 | 0.09 | 0.20 | 0.14 | 0.20 | LOP |
| fdg | 24 | -0.14 | -0.05 | -0.16 | -0.05 | -0.12 | -0.16 | -0.13 | -0.23 | 0.19 | -0.04 | 0.29 | 0.20 | 0.18 | 0.14 | 0.01 | -0.03 | 0.16 | 0.15 | 0.25 | 0.26 | 0.25 | 0.08 | 0.26 | 0.22 | ROP |

Supplemental Table 3: Correlation matrix for AD subjects Correlation coefficients with p-values significant after FDR control at  $q=0.05$  or  $q=0.1$  color coded using cool colors for negative correlations (blue:  $FDR < 0.05$ ; cyan:  $FDR < 0.1$ ) and warm colors for positive correlations (red:  $FDR < 0.05$ ; orange:  $FDR < 0.1$ ) Correlations with uncorrected  $p < 0.05$  that did not survive FDR control, were indicated in white (negative correlations) or yellow (positive correlations).

|     |    | LVF   | RVF   | LDF   | RDF   | LSA   | RSA   | LPC   | RPC   | LMT   | RMT   | LPL   | RPL   | LPM   | RPM   | LPU   | RPU   | LPR   | RPR   | LLT   | RLT   | LOC   | ROC   | LOP   | ROP   |     |
|-----|----|-------|-------|-------|-------|-------|-------|-------|-------|-------|-------|-------|-------|-------|-------|-------|-------|-------|-------|-------|-------|-------|-------|-------|-------|-----|
|     |    | PiB   |     |
|     | A  | 1     | 2     | 3     | 4     | 5     | 6     | 7     | 8     | 9     | 10    | 11    | 12    | 13    | 14    | 15    | 16    | 17    | 18    | 19    | 20    | 21    | 22    | 23    | 24    |     |
| fdg | 1  | -0.14 | -0.15 | -0.16 | -0.28 | -0.05 | -0.38 | -0.10 | -0.27 | 0.05  | 0.36  | 0.01  | -0.11 | -0.24 | -0.21 | -0.21 | -0.15 | 0.02  | -0.07 | -0.10 | 0.10  | 0.26  | 0.02  | 0.03  | LVF   |     |
| fdg | 2  | -0.27 | -0.35 | -0.28 | -0.45 | -0.13 | -0.51 | -0.27 | -0.45 | -0.36 | -0.10 | -0.33 | -0.38 | -0.25 | -0.31 | -0.27 | -0.31 | -0.25 | -0.21 | -0.28 | -0.39 | -0.21 | -0.04 | -0.24 | -0.19 | RVF |
| fdg | 3  | -0.10 | -0.21 | 0.02  | -0.27 | 0.09  | -0.42 | 0.01  | -0.42 | 0.04  | 0.13  | -0.08 | -0.16 | -0.23 | -0.20 | -0.25 | -0.19 | -0.15 | -0.01 | -0.12 | -0.25 | 0.17  | 0.37  | 0.15  | 0.20  | LDF |
| fdg | 4  | -0.36 | -0.49 | -0.29 | -0.54 | -0.19 | -0.62 | -0.32 | -0.64 | -0.26 | -0.07 | -0.38 | -0.47 | -0.37 | -0.45 | -0.42 | -0.46 | -0.36 | -0.36 | -0.41 | -0.60 | -0.15 | 0.16  | -0.18 | -0.04 | RDF |
| fdg | 5  | 0.29  | 0.11  | 0.29  | 0.16  | 0.67  | -0.03 | 0.29  | -0.15 | -0.21 | -0.10 | 0.39  | 0.34  | 0.27  | 0.44  | 0.09  | 0.29  | 0.28  | 0.37  | 0.10  | 0.04  | 0.26  | 0.25  | 0.37  | 0.46  | LSA |
| fdg | 6  | 0.26  | 0.00  | 0.34  | 0.07  | 0.56  | -0.13 | 0.29  | -0.27 | -0.17 | -0.26 | 0.20  | 0.17  | 0.23  | 0.31  | 0.02  | 0.26  | 0.19  | 0.29  | 0.04  | -0.11 | 0.17  | 0.17  | 0.27  | 0.38  | RSA |
| fdg | 7  | 0.46  | 0.11  | 0.52  | 0.19  | 0.57  | -0.18 | 0.69  | 0.04  | 0.09  | -0.27 | 0.54  | 0.45  | 0.45  | 0.43  | 0.50  | 0.52  | 0.48  | 0.59  | 0.53  | 0.22  | 0.63  | 0.38  | 0.66  | 0.49  | LPC |
| fdg | 8  | 0.38  | -0.02 | 0.45  | 0.06  | 0.41  | -0.31 | 0.55  | 0.02  | 0.18  | -0.24 | 0.36  | 0.27  | 0.26  | 0.29  | 0.41  | 0.42  | 0.43  | 0.48  | 0.48  | 0.09  | 0.61  | 0.38  | 0.63  | 0.54  | RPC |
| fdg | 9  | 0.08  | -0.20 | 0.29  | -0.20 | 0.11  | -0.33 | 0.51  | -0.12 | 0.55  | -0.18 | 0.19  | 0.17  | 0.03  | -0.06 | 0.24  | 0.20  | 0.18  | 0.23  | 0.39  | 0.07  | 0.55  | 0.52  | 0.59  | 0.49  | LMT |
| fdg | 10 | -0.33 | -0.05 | -0.45 | -0.13 | -0.15 | -0.13 | -0.17 | -0.32 | 0.20  | 0.48  | 0.21  | 0.15  | -0.11 | -0.16 | -0.22 | -0.32 | -0.30 | -0.16 | -0.23 | -0.03 | -0.09 | 0.13  | -0.21 | -0.22 | RMT |
| fdg | 11 | -0.58 | -0.64 | -0.39 | -0.72 | -0.43 | -0.63 | -0.51 | -0.69 | -0.05 | 0.17  | -0.44 | -0.49 | -0.63 | -0.63 | -0.59 | -0.59 | -0.51 | -0.48 | -0.50 | -0.48 | -0.06 | 0.52  | -0.07 | 0.16  | LPL |
| fdg | 12 | -0.30 | -0.44 | -0.13 | -0.52 | -0.09 | -0.53 | -0.22 | -0.54 | -0.22 | -0.04 | -0.26 | -0.28 | -0.35 | -0.34 | -0.34 | -0.29 | -0.24 | -0.15 | -0.27 | -0.32 | 0.01  | 0.42  | 0.07  | 0.18  | RPL |
| fdg | 13 | -0.53 | -0.61 | -0.28 | -0.74 | -0.43 | -0.57 | -0.38 | -0.57 | -0.11 | -0.06 | -0.67 | -0.70 | -0.56 | -0.71 | -0.51 | -0.51 | -0.49 | -0.55 | -0.40 | -0.45 | -0.13 | 0.22  | -0.15 | -0.01 | LPM |
| fdg | 14 | -0.24 | -0.40 | -0.10 | -0.55 | -0.06 | -0.43 | -0.27 | -0.46 | -0.41 | -0.18 | -0.51 | -0.55 | -0.36 | -0.42 | -0.41 | -0.32 | -0.24 | -0.26 | -0.31 | -0.45 | -0.23 | 0.05  | -0.14 | -0.02 | RPM |
| fdg | 15 | -0.59 | -0.61 | -0.41 | -0.75 | -0.51 | -0.58 | -0.48 | -0.57 | -0.13 | 0.01  | -0.60 | -0.60 | -0.57 | -0.68 | -0.49 | -0.52 | -0.51 | -0.52 | -0.42 | -0.38 | -0.20 | 0.21  | -0.21 | -0.10 | LPU |
| fdg | 16 | -0.31 | -0.31 | -0.19 | -0.49 | -0.14 | -0.27 | -0.33 | -0.40 | -0.40 | -0.11 | -0.50 | -0.47 | -0.28 | -0.36 | -0.41 | -0.24 | -0.33 | -0.29 | -0.36 | -0.22 | -0.37 | -0.13 | -0.33 | -0.19 | RPU |
| fdg | 17 | -0.45 | -0.32 | -0.41 | -0.56 | -0.30 | -0.20 | -0.38 | -0.27 | -0.21 | 0.11  | -0.53 | -0.49 | -0.47 | -0.51 | -0.56 | -0.48 | -0.51 | -0.35 | -0.41 | -0.28 | -0.47 | -0.20 | -0.47 | -0.30 | LPR |
| fdg | 18 | -0.28 | -0.07 | -0.41 | -0.34 | -0.15 | 0.00  | -0.36 | -0.08 | -0.49 | 0.10  | -0.44 | -0.46 | -0.27 | -0.36 | -0.41 | -0.42 | -0.35 | -0.31 | -0.35 | -0.24 | -0.60 | -0.51 | -0.61 | -0.58 | RPR |
| fdg | 19 | -0.13 | -0.20 | -0.01 | -0.45 | 0.04  | -0.20 | -0.07 | -0.11 | 0.01  | 0.05  | -0.38 | -0.35 | -0.37 | -0.29 | -0.29 | -0.13 | -0.10 | -0.05 | -0.03 | -0.07 | -0.06 | 0.04  | 0.04  | 0.15  | LLT |
| fdg | 20 | -0.25 | -0.27 | -0.27 | -0.48 | -0.04 | -0.22 | -0.23 | -0.19 | -0.46 | -0.26 | -0.42 | -0.44 | -0.17 | -0.28 | -0.18 | -0.18 | -0.14 | -0.30 | -0.16 | -0.19 | -0.33 | -0.33 | -0.26 | -0.21 | RLT |
| fdg | 21 | -0.16 | -0.02 | -0.28 | 0.04  | -0.06 | -0.03 | -0.09 | -0.13 | 0.16  | 0.36  | 0.16  | 0.14  | -0.07 | 0.02  | -0.27 | -0.21 | -0.31 | -0.03 | -0.23 | -0.09 | -0.07 | 0.01  | -0.22 | -0.03 | LOC |
| fdg | 22 | 0.11  | 0.25  | -0.11 | 0.25  | 0.14  | 0.05  | 0.07  | 0.23  | 0.05  | 0.37  | 0.19  | 0.17  | -0.06 | 0.16  | -0.03 | -0.12 | -0.01 | 0.22  | 0.04  | 0.00  | 0.04  | -0.10 | -0.06 | -0.12 | ROC |
| fdg | 23 | -0.10 | 0.25  | -0.24 | 0.17  | 0.05  | 0.15  | -0.20 | -0.17 | -0.16 | 0.33  | -0.07 | -0.05 | 0.04  | 0.02  | -0.27 | -0.16 | -0.30 | -0.14 | -0.33 | 0.00  | -0.40 | -0.45 | -0.55 | -0.54 | LOP |
| fdg | 24 | 0.17  | 0.43  | -0.03 | 0.23  | 0.27  | 0.45  | -0.05 | 0.27  | -0.30 | 0.05  | -0.12 | -0.10 | 0.18  | 0.17  | 0.00  | 0.11  | 0.09  | -0.01 | 0.00  | 0.17  | -0.46 | -0.79 | -0.45 | -0.51 | ROP |
